# Supplementary material for: Dysregulation of Mir-196b in Head and Neck Cancers Leads to Pleiotropic Effects in the Tumor Cells and Surrounding Stromal Fibroblasts
Source: PubMed Central journal article supplement (PMC5736577; doi:10.1038/s41598-017-18138-8), 2017-12-19
Supplement: 41598_2017_18138_MOESM1_ESM.pdf [file 41598_2017_18138_MOESM1_ESM.pdf]

## SUPPLEMENTARY INFORMATION

### TITLE: DYSREGULATION OF miR-196b IN HEAD AND NECK CANCERS LEADS TO PLEIOTROPIC EFFECTS IN THE TUMOR CELLS AND SURROUNDING STROMAL FIBROBLASTS

#### AUTHORS:

Saúl Álvarez-Teijeiro<sup>1</sup>, Sofía T. Menéndez<sup>1</sup>, M. Ángeles Villaronga<sup>1</sup>, Juan P. Rodrigo<sup>1</sup>, Lorea Manterola<sup>2</sup>, Lucas de Villalaín<sup>3</sup>, Juan C. de Vicente<sup>3</sup>, Laura Alonso-Durán<sup>1</sup>, M. Pilar Fernández<sup>4</sup>, Charles H. Lawrie<sup>2,5</sup>, Juana M. García-Pedrero<sup>1\*</sup>.

<sup>1</sup> Department of Otolaryngology, Hospital Universitario Central de Asturias and Instituto de Investigación Sanitaria del Principado de Asturias, IUOPA, University of Oviedo, Oviedo, CIBERONC, Spain.

<sup>2</sup> Molecular Oncology Group, Biodonostia Research Institute, San Sebastián, Spain.

<sup>3</sup> Department of Oral and Maxillofacial Surgery, Hospital Universitario Central de Asturias and Instituto de Investigación Sanitaria del Principado de Asturias, IUOPA, University of Oviedo, Oviedo, Spain.

<sup>4</sup> Department of Biochemistry and Molecular Biology, University of Oviedo, Oviedo, Spain.

<sup>5</sup> IKERBASQUE, Basque Foundation for Science, Bilbao, Spain

#### \* **Correspondence:**

Juana María García-Pedrero, PhD E-mail: [juanagp.finba@gmail.com](mailto:juanagp.finba@gmail.com)

Juan Pablo Rodrigo, MD, PhD E-mail: [juanpablo.rodrigo@sespa.es](mailto:juanpablo.rodrigo@sespa.es)

Hospital Universitario Central de Asturias

Edificio FINBA Laboratorio ORL – IUOPA

Avda Roma s/n 33011 Oviedo, Spain

Phone: +34 985107937

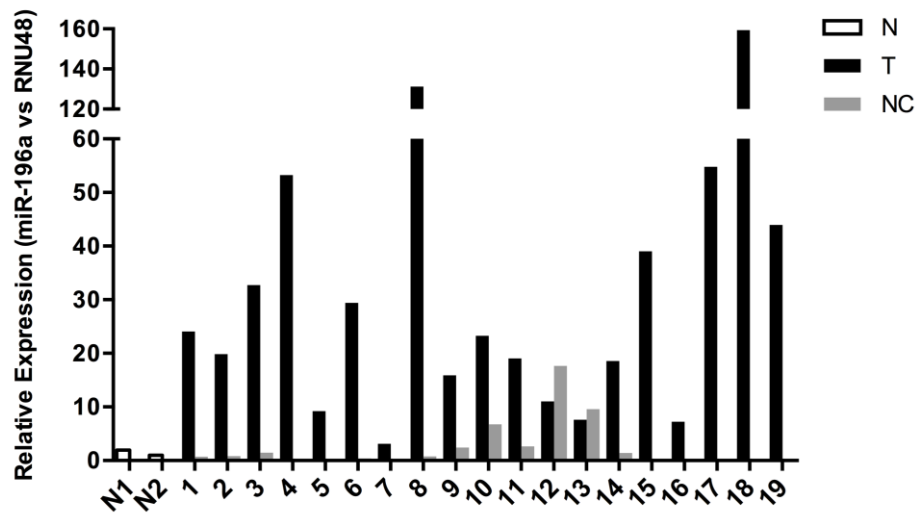

### Supplementary Figure S1

Analysis of miR-196a expression in HNSCC tissue specimens. miR-196a expression levels were quantified by RT-qPCR in 19 fresh primary tumors (T) and patient-matched normal counterparts (NC). Data were normalized to RNU48 levels, and relative to the normal mucosa from non-oncologic patients (N).

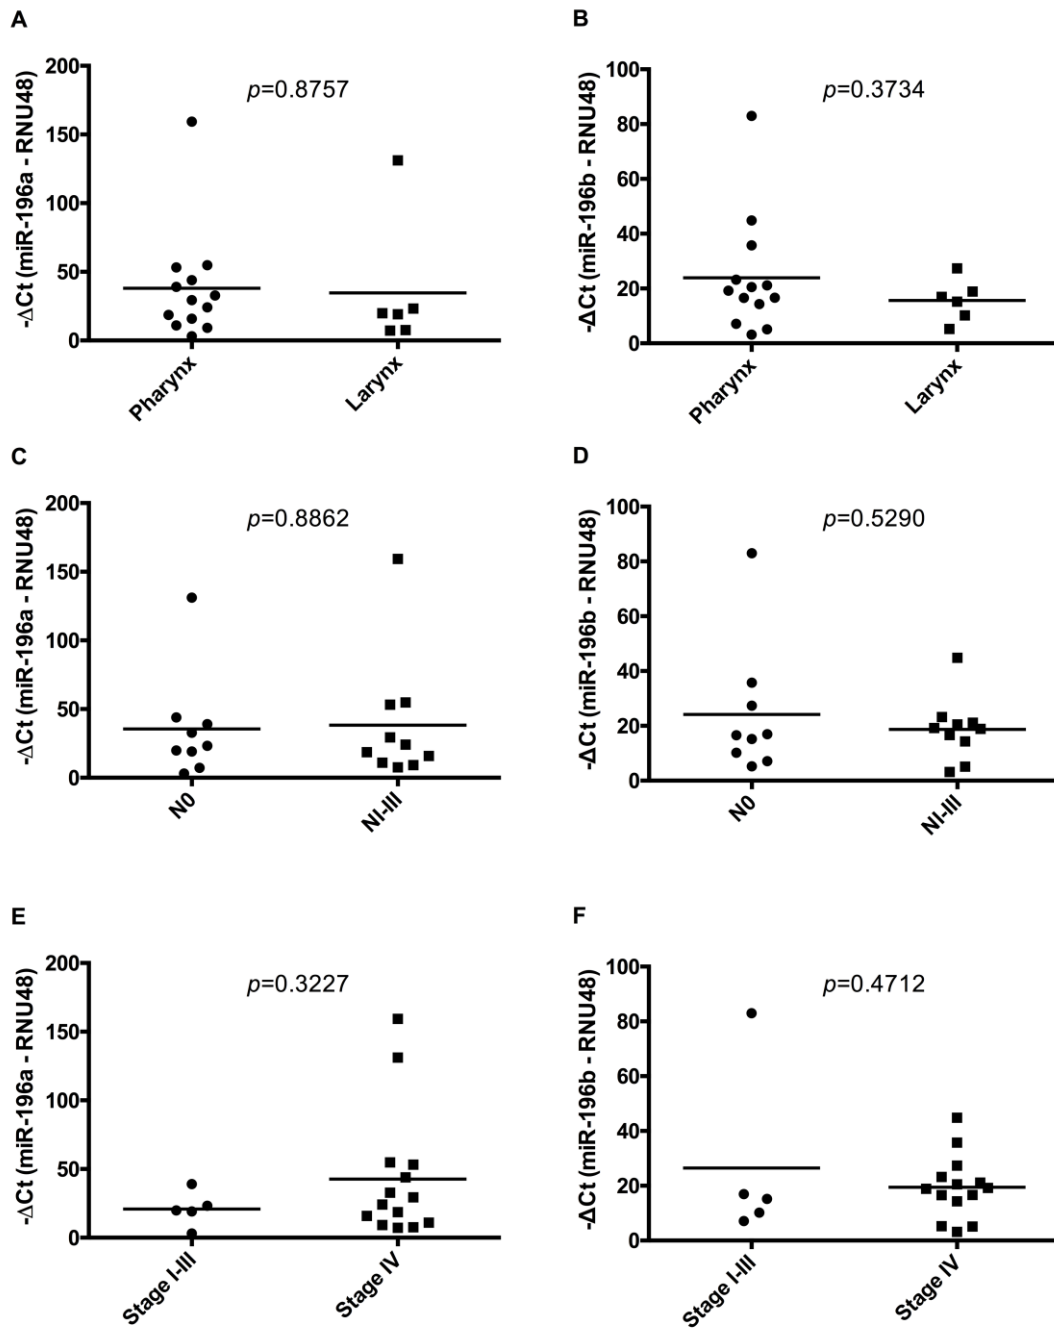

**Supplementary Figure S2**

miR-196a and miR-196b levels in HNSCC tissue specimens distributed according to the tumor site (**A and B**), pN classification (**C and D**), and disease stage (**E and F**). *p* values calculated by Student t-test.

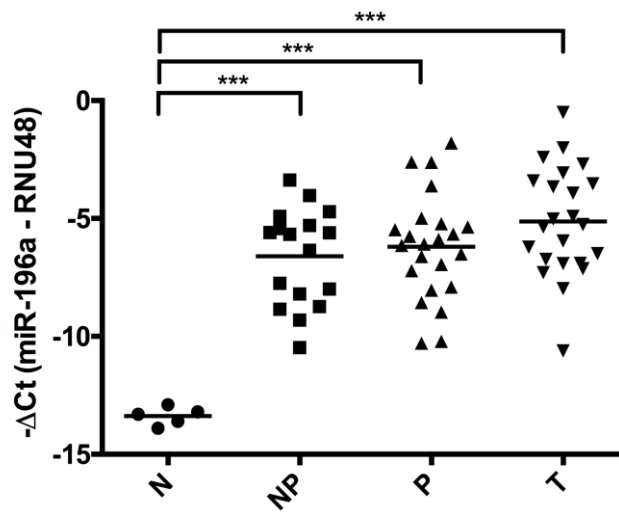

### Supplementary Figure S3

Analysis of miR-196a expression in early stages of HNSCC tumorigenesis. miR-196a expression levels were quantified by RT-qPCR in 40 patients with laryngeal precancerous lesions, comprising 17 non-progressing dysplasias (NP), 23 progressing dysplasias (P) and the 23 patient-matched invasive tumors (T) subsequently developed. Normal epithelia from 5 non-oncologic patients were included as (N) healthy controls.

\*\*\* $p < 0.001$  by Holm-Sidak's multiple comparisons test.

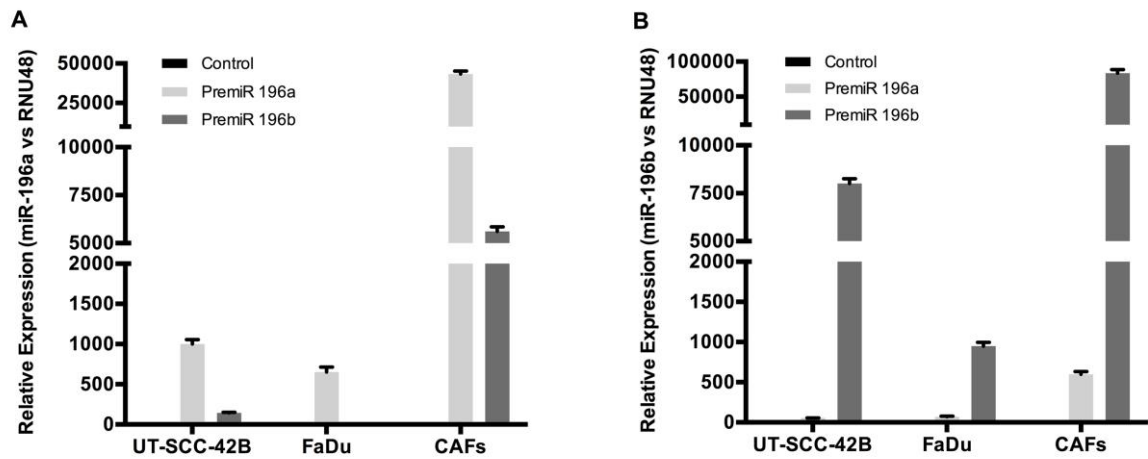

#### Supplementary Figure S4

Analysis of miR-196a and miR-196b expression in HNSCC cells and CAFs transfected with premiR precursors. **(A)** miR-196a and **(B)** miR-196b expression levels were quantified by qRT-PCR in UT-SCC-42B, FaDu or CAFs transfected with either premiR-196a, premiR-196b or non-targeting control. Data were normalized to RNU48 levels and relative to control-transfected cells. The graphs represent the mean  $\pm$  SD of at least three independent experiments run in triplicate.

**Supplementary Table S1.** Clinicopathologic characteristics of the HNSCC patients  
(N=19)

| <b>Characteristic</b>       | <b>No. (%)</b> |
|-----------------------------|----------------|
| <b>- Mean age, years</b>    | 60             |
| <b>- Gender</b>             |                |
| Male                        | 17 (89)        |
| Female                      | 2 (11)         |
| <b>- pT classification</b>  |                |
| T1-T2                       | 5 (26)         |
| T3                          | 5 (26)         |
| T4                          | 9 (47)         |
| <b>- pN classification</b>  |                |
| N0                          | 9 (47)         |
| N1-3                        | 10 (53)        |
| <b>- Disease stage</b>      |                |
| I-II                        | 3              |
| III                         | 2              |
| IV                          | 14             |
| <b>- Pathological grade</b> |                |
| Well differentiated         | 9 (47)         |
| Moderately differentiated   | 3 (16)         |
| Poorly differentiated       | 7 (37)         |
| <b>- Site</b>               |                |
| Pharynx                     | 13 (68)        |
| Larynx                      | 6 (32)         |
| <b>Total Cases</b>          | 19             |

**Supplementary Table S2.** Clinicopathologic characteristics of the premalignant patients (N=40)

| <b>Characteristic</b>         | <b>No. (%)</b> |
|-------------------------------|----------------|
| <b>- Mean age, years</b>      | 65             |
| <b>- Gender</b>               |                |
| Male                          | 36 (90)        |
| Female                        | 4 (10)         |
| <b>- Grade classification</b> |                |
| Low-grade                     | 17 (42)        |
| High-grade                    | 23 (58)        |
| <b>Total Cases</b>            | 40             |

### Supplementary Table S3

Primers used for real-time RT-PCR (5' → 3')

|           |                            |
|-----------|----------------------------|
| ANXA1-Fw  | GCAGGCCTGGTTTATTGAAA       |
| ANXA1-Rv  | GCTGTGCATTGTTTCGCTTA       |
| BACH1-Fw  | CTGATGGAGAGCTGAACATTACTCTT |
| BACH1-Rv  | AGCAGTGTAGGCAAACCTGAATTAAG |
| FASLG-Fw  | AGAGTCTACCAGCCAGAT         |
| FASLG-Rv  | AGTTGGACTTGCCTGTTA         |
| FAS-Fw    | ATGGCCAATTCTGCCATAAG       |
| FAS-Rv    | GACAAAGCCACCCCAAGTTA       |
| HMGA1-Fw  | ACAGCGCTGGTAGGGAGTCA       |
| HMGA1-Rv  | CCCCGAGGTCTCTTAGGTGTT      |
| HMOX1-Fw  | TGACCCGAGACGGCTTCA         |
| HMOX1-Rv  | CCTCCAGGGCCACATAGATG       |
| HOXA7-Fw  | TACCCCTGGATGCGGTCTT        |
| HOXA7-Rv  | CAGGTAGCGGTTGAAGTGGAA      |
| HOXC8-Fw  | TCCAGCCTCATGTTTCCAT        |
| HOXC8-Rv  | TCTGATACCGGCTGTAAGTTTGC    |
| HOXD8-Fw  | CTCGTCTCCTTCTCAAATGTTTCC   |
| HOXD8-Rv  | GACTGTAGGTTTGTCTTCCTCTTCGT |
| KRT5-Fw   | CCGCAGCCGGACAGAA           |
| KRT5-Rv   | TGTCTGCTGCAGCTCCTCAT       |
| NFKB1-Fw  | TGCCAACAGATGGCCCATAC       |
| NFKB1-Rv  | TGTTCTTTTCACTAGAGGCACCA    |
| RPL19-Fw  | GCGGAAGGGTACAGCCAAT        |
| RPL19-Rv  | GCAGCCGGCGCAAA             |
| S100A9-Fw | TGTGGCTCCTCGGCTTTG         |
| S100A9-Rv | GCGTTCAGCTGCGACAT          |
| TNF-Fw    | CCAGGCAGTCAGATCATCTTCTC    |
| TNF-Rv    | AGCTGGTTATCTCTCAGCTCCAC    |



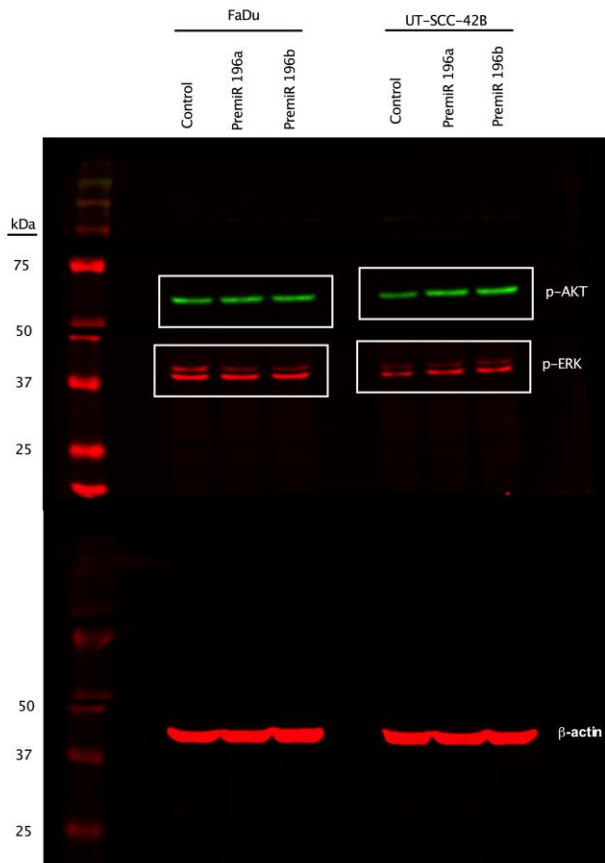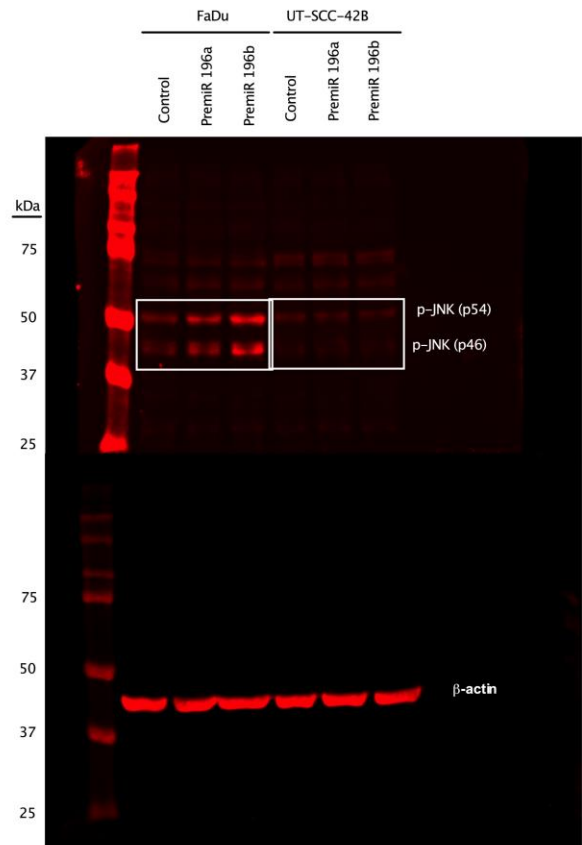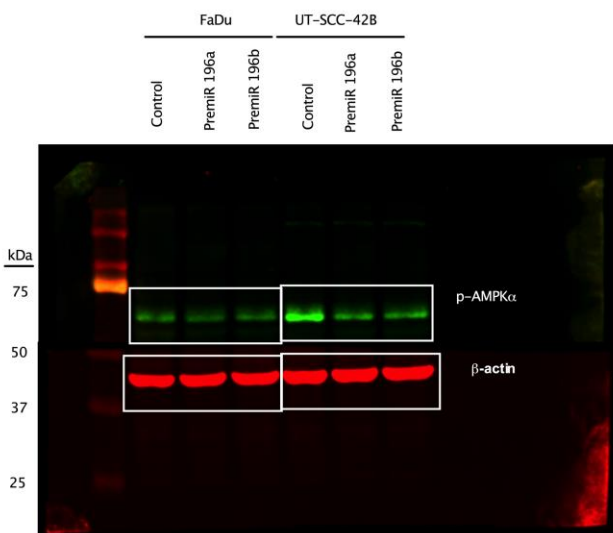

Uncropped membranes for Figure 6b
